# Supplementary material for: Quantum Supercritical Regime with Universal Magnetocaloric Scaling in Ising Magnets
Source: Research Square preprint supplement (doi:10.21203/rs.3.rs-6933063/v1), 2025-06-26
Supplement: Supplementary file 1 [file 17b1c9d4355d5a2a36be54b2.pdf]

Supplementary Information for  
**Quantum Supercritical Regime with Universal Magnetocaloric Scaling in Ising Magnets**

*Lv et al.*

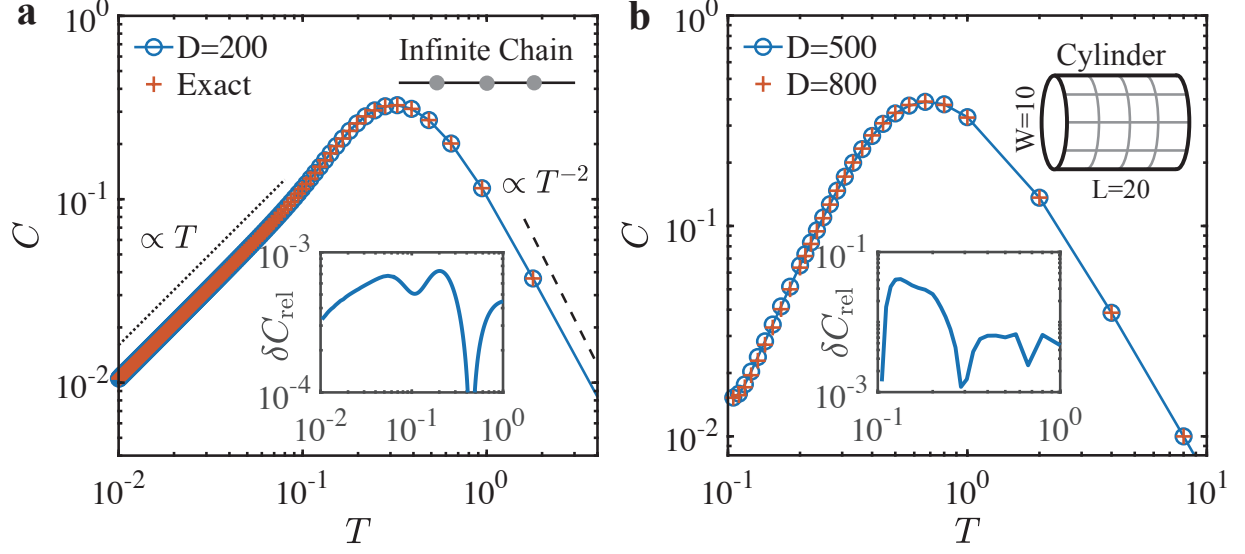

**Supplementary Figure 1. Convergence of the tensor-network calculations.** **a** The calculated specific heat  $C$  of the 1D QIM at the critical field  $g_c = 0.5$  (blue circles), which coincide with the exact results  $C_{\text{exact}}$  (red crosses). Inset shows the relative error  $\delta C_{\text{rel}} \equiv |C_{\text{exact}} - C|/C_{\text{exact}} < 10^{-3}$ . **b** The specific heat of 2D QIM is simulated on the  $10 \times 20$  cylinder (inset), at  $g = 1.45 \approx g_c$ . The results are well converged for bond dimension  $D = 800$ . Inset illustrates the relative difference between the  $D = 500$  and 800 data.

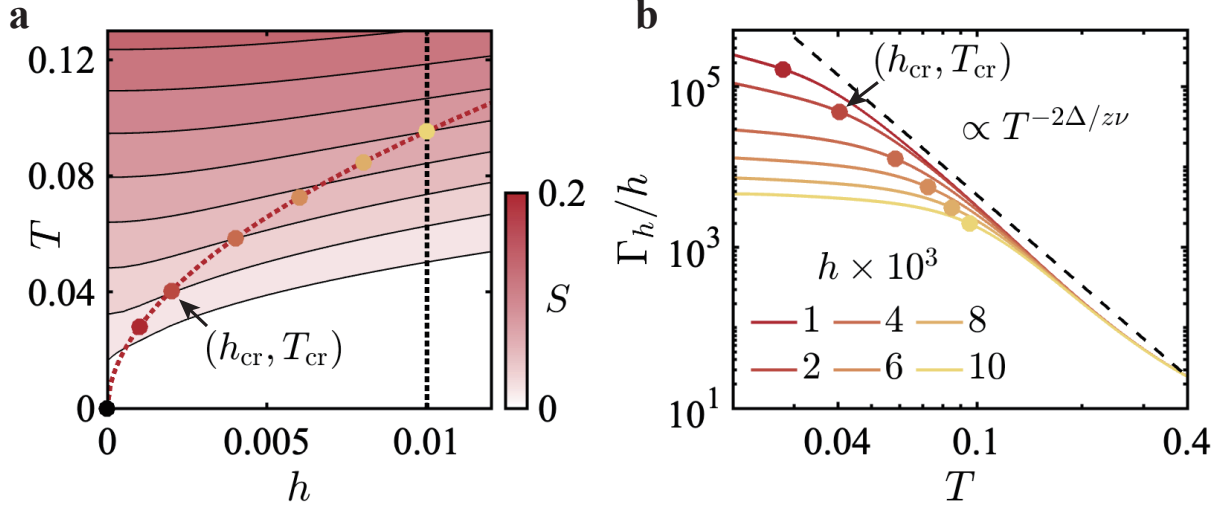

**Supplementary Figure 2. Quantum supercritical scaling of Grüneisen ratio  $\Gamma_h$ .** **a** The isentropes of 1D QIM in the  $h$ - $T$  plane. The red dashed line represents the QSR crossover line. **b** Results of the Grüneisen ratio  $\Gamma_h$  with various fixed  $h$ . The black dashed line illustrates the scaling  $\Gamma_h/h \propto T^{-2\Delta/z\nu}$ . The red circles  $(h_{\text{cr}}, T_{\text{cr}})$  are determined from Fig. 2c of the main text.

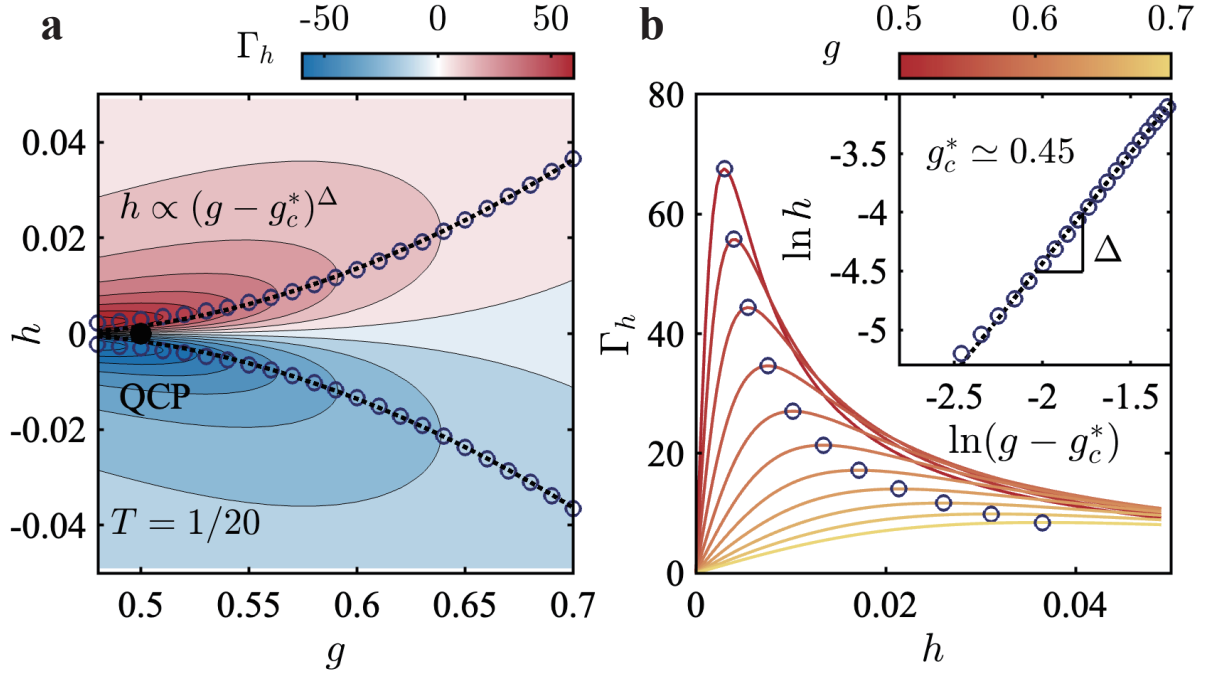

**Supplementary Figure 3. Crossover scaling and Grüneisen ratio  $\Gamma_h$  in the  $g$ - $h$  plane.** **a** Contour of Grüneisen ratio  $\Gamma_h$  of 1D QIM in the  $g$ - $h$  plane at a fixed temperature  $T = 1/20$ . The hollow circles indicate the peaks/dips of  $\Gamma_h$  by scanning  $h$  for various fixed  $g$ , with the curves of  $\Gamma_h$  vs.  $h$  in **b**. Inset illustrates the power-law scaling  $h \propto (g - g_c^*)^\Delta$  of the peak locations, where the fitting yields  $g_c^* \simeq 0.45$ .

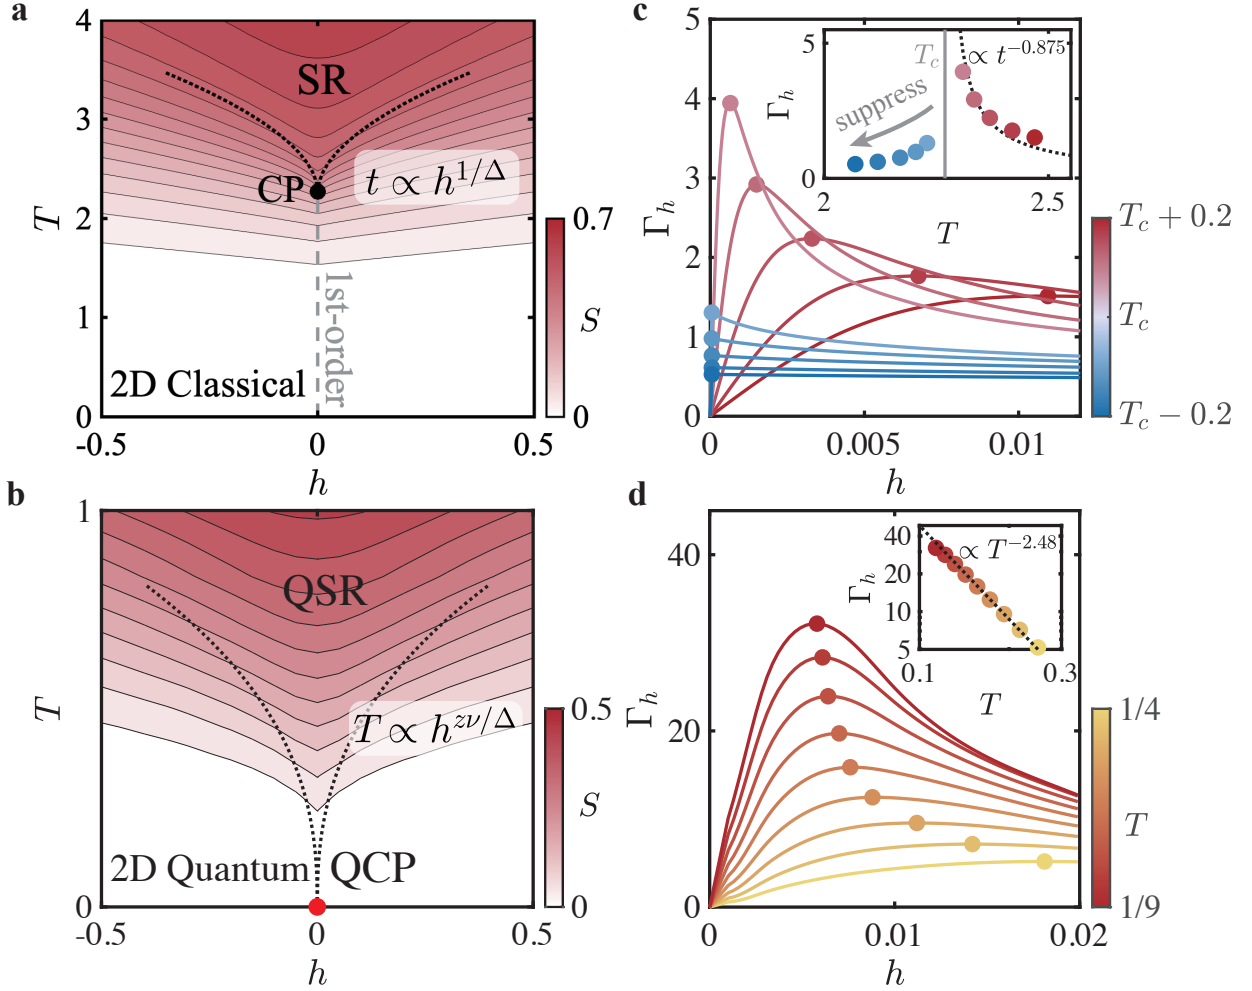

**Supplementary Figure 4. Grüneisen ratio of 2D classical and quantum Ising model.** **a** The isentropic lines of 2D classical Ising model, where the black circle marks the Curie point (CP). The black dotted lines are classical supercritical crossover lines with scaling  $t \propto h^{1/\Delta}$  ( $t \equiv T - T_c$ ), which correspond to the peaks/dips of  $\Gamma_h$  in **c**, and the gray dashed line represents the first-order phase transition. **b** Isentropic lines of the 2D quantum Ising model at critical transverse field, where the red dot labels the QCP at  $g_c \simeq 1.52$ . The dashed lines represent the QSR crossover boundary. **c** For classical SR, the Grüneisen ratio peaks are indicated, whose peak values follows  $\Gamma_h \propto t^{-(\Delta-1)} \propto t^{-0.875}$  and diverges at  $T_c$ ; for  $T < T_c$ ,  $\Gamma_h$  get quickly suppressed in the ordered phase (see inset). **d** For the QSR, the peak values of the Grüneisen ratio are marked by red dots, the inset shows a divergent scaling behavior  $\Gamma_h \propto T^{-2.48}$  in the zero-temperature limit.

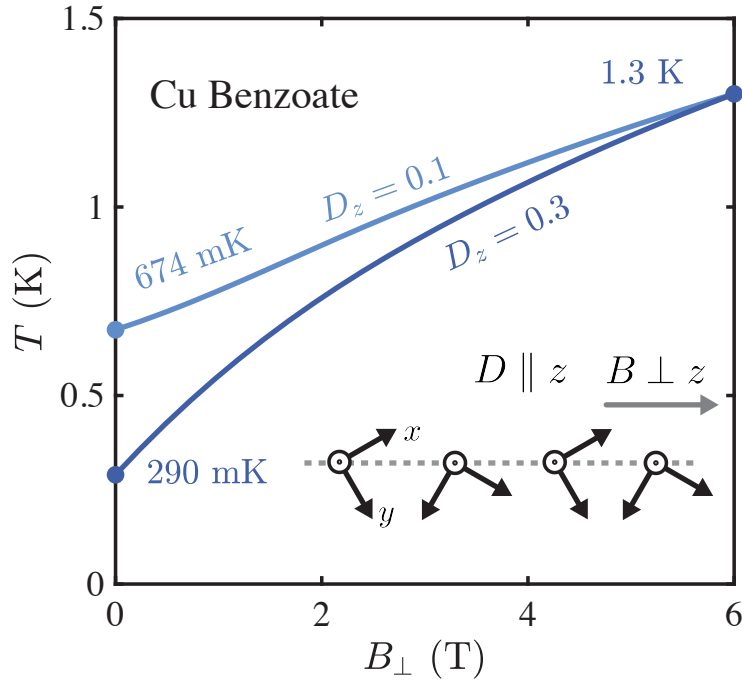

**Supplementary Figure 5. Quantum supercritical cooling effect in Cu benzoate.** Simulated isentropic line of the representative Heisenberg-Dzyaloshinskii-Moriya (HDM) compound Cu benzoate ( $J \simeq 18.2 \text{ K}$ ,  $D_z \simeq 0.1$ ) under a in-plane field  $B_{\perp}$ . The dark blue line represents the isentropic line for  $D_z = 0.3$ . The inset illustrates the effective transverse field  $g$  and staggered longitudinal field  $h_s$ , originated from the external field  $B_{\perp}$ .
